# Supplementary material for: The hidden teeth of sloths: evolutionary vestiges and the development of a simplified dentition
Source: PubMed Central journal article supplement (PMC4906291; doi:10.1038/srep27763), 2016-06-14

**Title: The hidden teeth of sloths: evolutionary vestiges and the development of a simplified dentition.**

**Authors**

Lionel Hautier<sup>1</sup>

Helder Gomes Rodrigues<sup>2,3</sup>

Guillaume Billet<sup>2</sup>

Robert J. Asher<sup>4</sup>

**Author affiliations**

<sup>1</sup>Institut des Sciences de l'Evolution de Montpellier, Université Montpellier, CNRS, IRD, EPHE, Cc 064; place Eugène Bataillon, 34095 Montpellier Cedex 5, France.

<sup>2</sup> Sorbonne Universités, CR2P, UMR CNRS 7207, Univ Paris 06, Muséum national d'Histoire naturelle, 8 rue Buffon, 75005 Paris, France.

<sup>3</sup>Mécanismes adaptatifs et évolution (MECADEV), UMR 7179, CNRS, Funevol team, Muséum national d'Histoire naturelle, 55 rue Buffon, Bat. Anatomie Comparée, CP 55, 75005 Paris, France.

<sup>4</sup>Department of Zoology, University of Cambridge, Downing St., Cambridge CB2 3EJ, UK.

**Corresponding authors**

Lionel Hautier: [lionel.hautier@univ-montp2.fr](mailto:lionel.hautier@univ-montp2.fr)

**S1** – Dental terminology used for the comparisons between *Choloepus* (A and B) and *Bradypus* (C and D). Upper teeth are in violet; lower teeth are in green; premaxillary bone is in red.

# *Choloepus*

**A**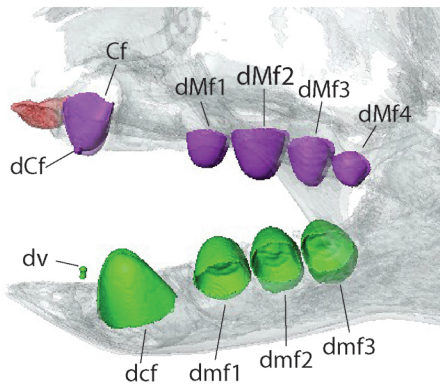**B**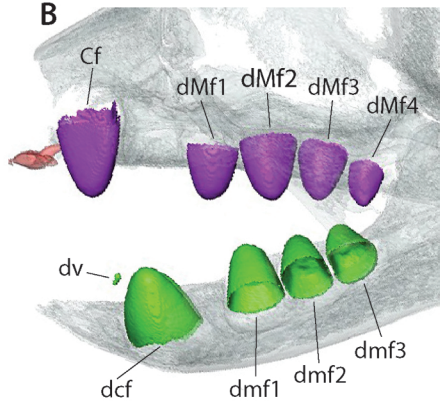

# *Bradypus*

**C**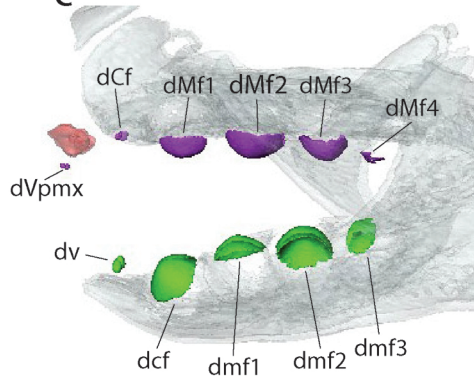**D**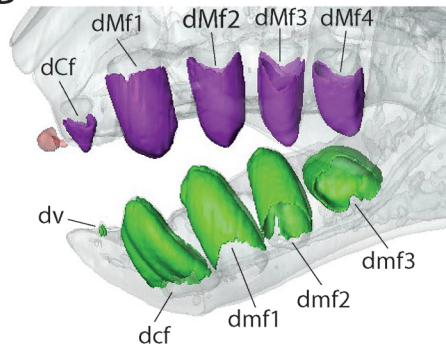

Supplement: srep27763-s1.pdf [file srep27763-s1.pdf]
