# Supplementary material for: The hidden teeth of sloths: evolutionary vestiges and the development of a simplified dentition
Source: PubMed Central journal article supplement (PMC4906291; doi:10.1038/srep27763), 2016-06-14
Supplement: srep27763-s2.pdf [file srep27763-s2.pdf]

**Title: The hidden teeth of sloths: evolutionary vestiges and the development of a simplified dentition.**

**Authors**

Lionel Hautier<sup>1</sup>

Helder Gomes Rodrigues<sup>2,3</sup>

Guillaume Billet<sup>2</sup>

Robert J. Asher<sup>4</sup>

**Author affiliations**

<sup>1</sup>Institut des Sciences de l'Evolution de Montpellier, Université Montpellier, CNRS, IRD, EPHE, Cc 064; place Eugène Bataillon, 34095 Montpellier Cedex 5, France.

<sup>2</sup> Sorbonne Universités, CR2P, UMR CNRS 7207, Univ Paris 06, Muséum national d'Histoire naturelle, 8 rue Buffon, 75005 Paris, France.

<sup>3</sup>Mécanismes adaptatifs et évolution (MECADEV), UMR 7179, CNRS, Funevol team, Muséum national d'Histoire naturelle, 55 rue Buffon, Bat. Anatomie Comparée, CP 55, 75005 Paris, France.

<sup>4</sup>Department of Zoology, University of Cambridge, Downing St., Cambridge CB2 3EJ, UK.

**Corresponding authors**

Lionel Hautier: [lionel.hautier@univ-montp2.fr](mailto:lionel.hautier@univ-montp2.fr)

**S2** – List of specimens, including the number of upper and lower teeth observed (functional and vestigial), the skull length taken on the 3D reconstruction, and the voxel size.

| <b>Specimen number</b> | <b>Genus</b>     | <b>Species</b>      | <b>Upper teeth</b> | <b>Lower teeth</b> | <b>Skull length</b> | <b>Voxel size (mm)</b> |
|------------------------|------------------|---------------------|--------------------|--------------------|---------------------|------------------------|
| BMNH 52-1173           | <i>Bradypus</i>  | <i>tridactylus</i>  | 5                  | 5                  | 41.83               | 0.0766                 |
| BMNH 79-6-3            | <i>Bradypus</i>  | <i>tridactylus</i>  | 5                  | 5                  | 32.3                | 0.0528                 |
| BMNH1989-226           | <i>Bradypus</i>  | <i>tridactylus</i>  | 5                  | 4                  | 58.07               | 0.0991                 |
| BMNH 1994-6B           | <i>Bradypus</i>  | <i>tridactylus</i>  | 6                  | 5                  | 31.52               | 0.0435                 |
| BMNH 2010-89           | <i>Bradypus</i>  | <i>sp.</i>          | 5                  | 4                  | 41.71               | 0.0573                 |
| ZMB 91-95              | <i>Bradypus</i>  | <i>tridactylus</i>  | 5                  | 5                  | 40.91               | 0.0414                 |
| ZMB18834               | <i>Bradypus</i>  | <i>tridactylus</i>  | 5                  | 4                  | 34.94               | 0.0420                 |
| ZMB18835               | <i>Bradypus</i>  | <i>sp.</i>          | 5                  | 4                  | 37.81               | 0.0400                 |
| ZMB 33812              | <i>Bradypus</i>  | <i>variegatus</i>   | 1                  | 1                  | 23.73               | 0.0292                 |
| ZMB 41120              | <i>Bradypus</i>  | <i>variegatus</i>   | 6                  | 5                  | 41.84               | 0.0433                 |
| ZMB 41122              | <i>Bradypus</i>  | <i>variegatus</i>   | 3                  | 3                  | 25.86               | 0.0371                 |
| MNHN 1881-111          | <i>Bradypus</i>  | <i>tridactylus</i>  | 4                  | 5                  | 29.63               | 0.1080                 |
| MNHN1902-325           | <i>Bradypus</i>  | <i>sp.</i>          | 5                  | 5                  | 30.24               | 0.0700                 |
| MNHN1933-489           | <i>Bradypus</i>  | <i>sp.</i>          | 5                  | 4                  | 43.21               | 0.1400                 |
| MNHN 1995-326 A        | <i>Bradypus</i>  | <i>variegatus</i>   | 6                  | 5                  | 25.85               | 0.0283                 |
| MNHN 1995-326 B        | <i>Bradypus</i>  | <i>variegatus</i>   | 6                  | 5                  | 30.44               | 0.0356                 |
| MNHN 1995-327          | <i>Bradypus</i>  | <i>tridactylus?</i> | 5                  | 4                  | 38.1                | 0.0571                 |
| MNHN 1918-18           | <i>Bradypus</i>  | <i>sp.</i>          | 5                  | 4                  | 49.71               | 0.1500                 |
| BMNH 72-10-24-1        | <i>Choloepus</i> | <i>didactylus</i>   | 6                  | 5                  | 41.34               | 0.0268                 |
| BMNH 1863-12-19-2      | <i>Choloepus</i> | <i>didactylus</i>   | 5                  | 5                  | 52.62               | 0.0991                 |
| BMNH 1882-625          | <i>Choloepus</i> | <i>didactylus</i>   | 6                  | 5                  | 45.14               | 0.0250                 |
| ZM AC 1901-393         | <i>Choloepus</i> | <i>didactylus</i>   | 5                  | 5                  | 44.44               | 0.0262                 |
| ZMB 49 49              | <i>Choloepus</i> | <i>hoffmani</i>     | 5                  | 5                  | 49.23               | 0.0422                 |
